# Supplementary material
Source: HighWire-hosted journal article supplement (https://erj.ersjournals.com/content/59/4/2101315)
Supplement: inline-supplementary-material-2 [file inline-supplementary-material-2.pdf]

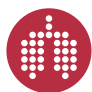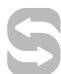

SHAREABLE PDF

# Maternal diet in pregnancy and child's respiratory outcomes: an individual participant data meta-analysis of 18 000 children

Sara M. Mensink-Bout <sup>1,2</sup>, Evelien R. van Meel <sup>1,2</sup>, Johan C. de Jongste <sup>2</sup>, Isabella Annesi-Maesano <sup>3</sup>, Adrien M. Aubert <sup>4</sup>, Jonathan Y. Bernard <sup>4,5</sup>, Ling-Wei Chen <sup>6</sup>, Cyrus Cooper <sup>7,8</sup>, Sarah R. Crozier <sup>7</sup>, Wojciech Hanke <sup>9</sup>, Nicholas C. Harvey <sup>7,8</sup>, James R. Hébert <sup>10,11</sup>, Barbara Heude <sup>4</sup>, Joanna Jerzynska <sup>12</sup>, Cecily C. Kelleher <sup>6</sup>, John Mehegan <sup>6</sup>, Fionnuala M. McAuliffe <sup>13</sup>, Catherine M. Phillips <sup>14</sup>, Kinga Polanska <sup>9</sup>, Caroline L. Relton <sup>14</sup>, Nitin Shivappa <sup>10,11</sup>, Matthew Suderman <sup>14</sup>, Vincent W.V. Jaddoe <sup>1,15</sup> and Liesbeth Duijts <sup>1,2,16</sup>

<sup>1</sup>The Generation R Study Group, Erasmus MC, University Medical Center, Rotterdam, The Netherlands. <sup>2</sup>Department of Pediatrics, Division of Respiratory Medicine and Allergology, Erasmus MC, University Medical Center, Rotterdam, The Netherlands. <sup>3</sup>Institute of Epidemiology and Public Health, EPAR, Sorbonne Université, Paris, France. <sup>4</sup>Centre for Research in Epidemiology and Statistics (CRESS), Université de Paris, Paris, France. <sup>5</sup>Singapore Institute for Clinical Sciences (SICS), Agency for Science, Technology and Research (A\*STAR), Singapore. <sup>6</sup>HRB Centre for Health and Diet Research, School of Public Health, Physiotherapy, and Sports Science, University College Dublin, Dublin, Ireland. <sup>7</sup>MRC Lifecourse Epidemiology Unit, University of Southampton, Southampton General Hospital, Southampton, UK. <sup>8</sup>NIHR Southampton Nutrition Biomedical Research Centre, University of Southampton and University Hospital Southampton NHS Foundation Trust, Southampton, UK. <sup>9</sup>Department of Environmental Epidemiology, Nofer Institute of Occupational Medicine, Lodz, Poland. <sup>10</sup>Cancer Prevention and Control Program and Department of Epidemiology and Biostatistics, Arnold School of Public Health, University of South Carolina, Columbia, SC, USA. <sup>11</sup>Department of Nutrition Connecting Health Innovations LLC, Columbia, SC, USA. <sup>12</sup>Department of Pediatrics and Allergy, Medical University of Lodz, Copernicus Memorial Hospital, Lodz, Poland. <sup>13</sup>UCD Perinatal Research Centre, School of Medicine, University College Dublin, National Maternity Hospital, Dublin, Ireland. <sup>14</sup>MRC Integrative Epidemiology Unit, Population Health Sciences, Bristol Medical School, University of Bristol, Bristol, UK. <sup>15</sup>Department of Pediatrics, Erasmus MC, University Medical Center, Rotterdam, The Netherlands. <sup>16</sup>Department of Pediatrics, Division of Neonatology, Erasmus MC, University Medical Center, Rotterdam, The Netherlands.

Corresponding author: Liesbeth Duijts (l.duijts@erasmusmc.nl)

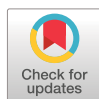

Shareable abstract (@ERSpublications)

**A suboptimal maternal diet in pregnancy, as defined by a higher inflammatory potential or low quality of the diet, does not play an important role in the development of respiratory diseases in childhood** <https://bit.ly/38dj3jU>

**Cite this article as:** Mensink-Bout SM, van Meel ER, de Jongste JC, *et al.* Maternal diet in pregnancy and child's respiratory outcomes: an individual participant data meta-analysis of 18 000 children. *Eur Respir J* 2022; 59: 2101315 [DOI: 10.1183/13993003.01315-2021].

This single-page version can be shared freely online.

Copyright ©The authors 2022.

This version is distributed under the terms of the Creative Commons Attribution Non-Commercial Licence 4.0. For commercial reproduction rights and permissions contact [permissions@ersnet.org](mailto:permissions@ersnet.org)

Received: 28 Aug 2020  
Accepted: 20 Aug 2021

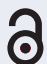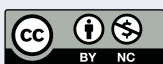

## Abstract

**Rationale** Severe fetal malnutrition has been related to an increased risk of respiratory diseases later in life, but evidence for the association of a suboptimal diet during pregnancy with respiratory outcomes in childhood is conflicting. We aimed to examine whether a pro-inflammatory or low-quality maternal diet during pregnancy was associated with child's respiratory health.

**Methods** We performed an individual participant meta-analysis among 18 326 mother–child pairs from seven European birth cohorts. Maternal pro-inflammatory and low-quality diets were estimated by energy-adjusted Dietary Inflammatory Index (E-DII) and Dietary Approaches to Stop Hypertension (DASH) scores. Preschool wheezing and school-age asthma were measured using questionnaires and lung function by spirometry.

**Results** After adjustment for lifestyle and sociodemographic factors, we observed that a higher maternal E-DII score (a more pro-inflammatory diet) during pregnancy was associated only with a lower forced vital capacity (FVC) in children (z-score difference −0.05, 95% CI −0.08– −0.02, per interquartile range increase). No linear associations of the maternal E-DII or DASH score with child's wheezing or asthma were observed. In an exploratory examination of the extremes, a very low DASH score (<10th percentile)

(a very low dietary quality) was associated with an increased risk of preschool wheezing and a low forced expiratory volume in 1 s/FVC (z-score  $<-1.64$ ) (OR 1.20, 95% CI 1.06–1.36 and z-score difference 1.40, 95% CI 1.06–1.85, compared to  $\geq 10$ th percentile), with corresponding population attributable risk fractions of 1.7% and 3.3%, respectively.

**Conclusion** The main results from this individual participant data meta-analysis do not support the hypothesis that maternal pro-inflammatory or low-quality diet in pregnancy are related to respiratory diseases in childhood.
